# Supplementary material
Source: Springer Nature journal article supplement (https://www.springermedizin.de/resource/supplementary/12967_2012_1053_MOESM2_ESM.pdf/9573196)

A.

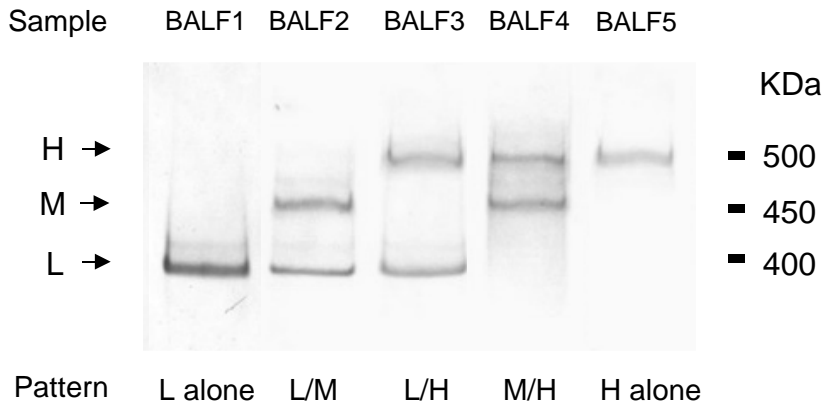

B.

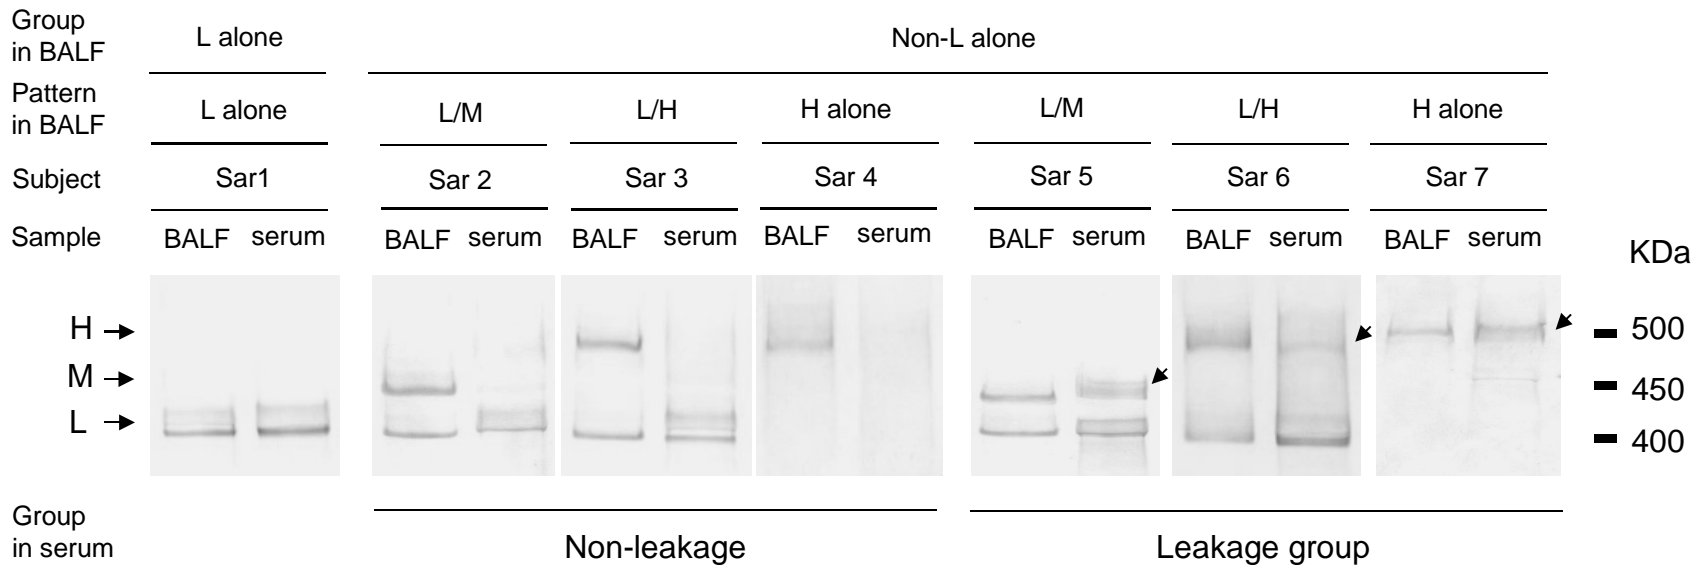

Supplement: MOESM2 [file 9573196]
